# Supplementary material
Source: ML conference proceedings conference paper supplement (https://proceedings.mlr.press/v38/goix15.html)
Supplement: Supplementary file [file goix15-supp.pdf]

---

# On Anomaly Ranking and Excess-Mass Curves, Supplementary Material

---

**Nicolas Goix**  
 UMR LTCI No. 5141  
 Telecom ParisTech/CNRS  
 Institut Mines-Telecom  
 Paris, 75013, France

**Anne Sabourin**  
 UMR LTCI No. 5141  
 Telecom ParisTech/CNRS  
 Institut Mines-Telecom  
 Paris, 75013, France

**Stéphan Cléménçon**  
 UMR LTCI No. 5141  
 Telecom ParisTech/CNRS  
 Institut Mines-Telecom  
 Paris, 75013, France

## 1 Illustrations

Note that the scoring function we built in Algorithm 1 is an estimator of the density  $f$  (usually called the silhouette), since  $f(x) = \int_0^\infty \mathbb{1}_{f \geq t} dt = \int_0^\infty \mathbb{1}_{\Omega_t^*} dt$  and  $s(x) := \sum_{k=1}^K (t_k - t_{k-1}) \mathbb{1}_{x \in \hat{\Omega}_{t_k}}$  which is a discretization of  $\int_0^\infty \mathbb{1}_{\hat{\Omega}_t} dt$ . This fact is illustrated in Fig. 1

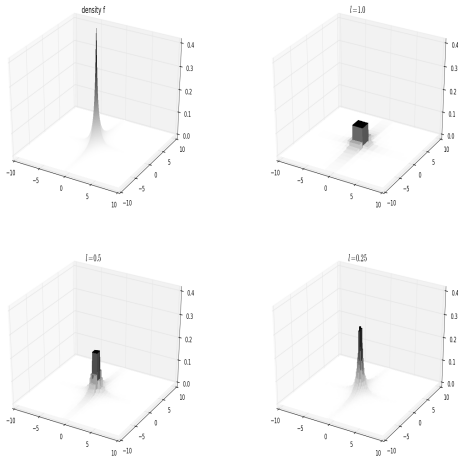

Figure 1: density and scoring functions

## 2 Detailed Proofs

### Proof of Proposition 1

Let  $t > 0$ . Recall that  $EM^*(t) = \alpha(t) - t\lambda(t)$  where  $\alpha(t)$  denote the mass at level  $t$ , namely  $\alpha(t) = \mathbb{P}(f(X) \geq t)$ , and  $\lambda(t)$  denote the volume at level  $t$ , i.e.  $\lambda(t) = Leb(\{x, f(x) \geq t\})$ . For  $h > 0$ , let  $A(h)$  denote the quantity  $A(h) = 1/h(\alpha(t+h) - \alpha(t))$  and

$B(h) = 1/h(\lambda(t+h) - \lambda(t))$ . It is straightforward to see that  $A(h)$  and  $B(h)$  converge when  $h \rightarrow 0$ , and expressing  $EM^{*'} = \alpha'(t) - t\lambda'(t) - \lambda(t)$ , it suffices to show that  $\alpha'(t) - t\lambda'(t) = 0$ , namely  $\lim_{h \rightarrow 0} A(h) - tB(h) = 0$ . Now we have  $A(h) - tB(h) = \frac{1}{h} \int_{t \leq f \leq t+h} f - t \leq \frac{1}{h} \int_{t \leq f \leq t+h} h = Leb(t \leq f \leq t+h) \rightarrow 0$  because  $f$  has no flat part.

### Proof of Lemma 1:

On the one hand, for every  $\Omega$  measurable,

$$\begin{aligned} \mathbb{P}(X \in \Omega) - t Leb(\Omega) &= \int_{\Omega} (f(x) - t) dx \\ &\leq \int_{\Omega \cap \{f \geq t\}} (f(x) - t) dx \\ &\leq \int_{\{f \geq t\}} (f(x) - t) dx \\ &= \mathbb{P}(f(X) \geq t) - t Leb(\{f \geq t\}). \end{aligned}$$

It follows that  $\{f \geq t\} \in \arg \max_{A \text{ meas.}} \mathbb{P}(X \in A) - t Leb(A)$ .

On the other hand, suppose  $\Omega \in \arg \max_{A \text{ meas.}} \mathbb{P}(X \in A) - t Leb(A)$  and  $Leb(\{f > t\} \setminus \Omega) > 0$ . Then there is  $\epsilon > 0$  such that  $Leb(\{f > t + \epsilon\} \setminus \Omega) > 0$  (by subadditivity of Leb, if it is not the case, then  $Leb(\{f > t\} \setminus \Omega) = Leb(\cup_{\epsilon \in \mathbb{Q}_+} \{f > t + \epsilon\} \setminus \Omega) = 0$ ). We have thus

$$\int_{\{f > t\} \setminus \Omega} (f(x) - t) dx > \epsilon \cdot Leb(\{f > t + \epsilon\} \setminus \Omega) > 0,$$

so that

$$\begin{aligned} \int_{\Omega} (f(x) - t) dx &\leq \int_{\{f>t\}} (f(x) - t) dx \\ &\quad - \int_{\{f>t\} \setminus \Omega} (f(x) - t) dx \\ &< \int_{\{f>t\}} (f(x) - t) dx, \end{aligned}$$

i.e

$$\begin{aligned} \mathbb{P}(X \in \Omega) - t \text{Leb}(\Omega) \\ &< \mathbb{P}(f(X) \geq t) - t \text{Leb}(\{x, f(x) \geq t\}) \end{aligned}$$

which is a contradiction:  $\{f > t\} \subset \Omega$  Leb-a.s. .

To show that  $\Omega_t^* \subset \{x, f(x) \geq t\}$ , suppose that  $\text{Leb}(\Omega_t^* \cap \{f < t\}) > 0$ . Then by sub-additivity of Leb just as above, there is  $\epsilon > 0$  s.t  $\text{Leb}(\Omega_t^* \cap \{f < t - \epsilon\}) > 0$  and  $\int_{\Omega_t^* \cap \{f < t - \epsilon\}} f - t \leq -\epsilon \cdot \text{Leb}(\Omega_t^* \cap \{f < t - \epsilon\}) < 0$ . It follows that  $\mathbb{P}(X \in \Omega_t^*) - t \text{Leb}(\Omega_t^*) < \mathbb{P}(X \in \Omega_t^* \setminus \{f < t - \epsilon\}) - t \text{Leb}(\Omega_t^* \setminus \{f < t - \epsilon\})$  which is a contradiction with the optimality of  $\Omega_t^*$ .

### Proof of Proposition 2

Proving the first assertion is immediate, since  $\int_{f \geq t} (f(x) - t) dx \geq \int_{s \geq t} (f(x) - t) dx$ . Let us now turn to the second assertion. We have:

$$\begin{aligned} EM^*(t) - EM_s(t) &= \int_{f>t} (f(x) - t) dx \\ &\quad - \sup_{u>0} \int_{s>u} (f(x) - t) dx \\ &= \inf_{u>0} \int_{f>t} (f(x) - t) dx \\ &\quad - \int_{s>u} (f(x) - t) dx, \end{aligned}$$

yet:

$$\begin{aligned} \int_{\{f>t\} \setminus \{s>u\}} (f(x) - t) dx + \int_{\{s>u\} \setminus \{f>t\}} (t - f(x)) dx \\ \leq (\|f\|_{\infty} - t) \cdot \text{Leb}(\{f > t\} \setminus \{s > u\}) \\ + t \text{Leb}(\{s > u\} \setminus \{f > t\}), \end{aligned}$$

so we obtain:

$$\begin{aligned} EM^*(t) - EM_s(t) &\leq \max(t, \|f\|_{\infty} - t) \\ &\quad \times \text{Leb}(\{s > u\} \Delta \{f > t\}) \\ &\leq \|f\|_{\infty} \cdot \text{Leb}(\{s > u\} \Delta \{f > t\}). \end{aligned}$$

To prove the third point, note that:

$$\begin{aligned} \inf_{u>0} \text{Leb}(\{s > u\} \Delta \{f > t\}) \\ = \inf_{T \nearrow} \text{Leb}(\{Ts > t\} \Delta \{f > t\}) \end{aligned}$$

Yet,

$$\begin{aligned} \text{Leb}(\{Ts > t\} \Delta \{f > t\}) \\ \leq \text{Leb}(\{f > t - \|Ts - f\|_{\infty}\} \setminus \{f > t + \|Ts - f\|_{\infty}\}) \\ = \lambda(t - \|Ts - f\|_{\infty}) - \lambda(t + \|Ts - f\|_{\infty}) \\ = - \int_{t - \|Ts - f\|_{\infty}}^{t + \|Ts - f\|_{\infty}} \lambda'(u) du. \end{aligned}$$

On the other hand, we have  $\lambda(t) = \int_{\mathbb{R}^d} \mathbb{1}_{f(x) \geq t} dx = \int_{\mathbb{R}^d} g(x) \|\nabla f(x)\| dx$  where we let  $g(x) = \frac{1}{\|\nabla f(x)\|} \mathbb{1}_{\{x, \|\nabla f(x)\| > 0, f(x) \geq t\}}$ . The co-area formula (see [1], p.249, th3.2.12) gives in this case:  $\lambda(t) = \int_{\mathbb{R}} du \int_{f^{-1}(u)} \frac{1}{\|\nabla f(x)\|} \mathbb{1}_{\{x, f(x) \geq t\}} d\mu(x) = \int_t^{\infty} du \int_{f^{-1}(u)} \frac{1}{\|\nabla f(x)\|} d\mu(x)$  so that  $\lambda'(t) = - \int_{f^{-1}(t)} \frac{1}{\|\nabla f(x)\|} d\mu(x)$ .

Let  $\eta_{\epsilon}$  such that  $\forall u > \epsilon, |\lambda'(u)| = \int_{f^{-1}(u)} \frac{1}{\|\nabla f(x)\|} d\mu(x) < \eta_{\epsilon}$ . We obtain:

$$\begin{aligned} \sup_{t \in [\epsilon + \inf_{T \nearrow} \|f - Ts\|_{\infty}, \|f\|_{\infty}]} EM^*(t) - EM_s(t) \\ \leq 2 \cdot \eta_{\epsilon} \cdot \|f\|_{\infty} \inf_{T \nearrow} \|f - Ts\|_{\infty}. \end{aligned}$$

In particular, if  $\inf_{T \nearrow} \|f - Ts\|_{\infty} \leq \epsilon_1$ ,

$$\sup_{[\epsilon + \epsilon_1, \|f\|_{\infty}]} |EM^* - EM_s| \leq 2 \cdot \eta_{\epsilon} \cdot \|f\|_{\infty} \cdot \inf_{T \nearrow} \|f - Ts\|_{\infty}.$$

### Proof of Proposition 3

Let  $i$  in  $\{1, \dots, K\}$ . First, note that:

$$\begin{aligned} H_{n, t_{i+1}}(\hat{\Omega}_{t_{i+1}} \cup \hat{\Omega}_{t_i}) &= H_{n, t_{i+1}}(\hat{\Omega}_{t_{i+1}}) \\ &\quad + H_{n, t_{i+1}}(\hat{\Omega}_{t_i} \setminus \hat{\Omega}_{t_{i+1}}), \\ H_{n, t_i}(\hat{\Omega}_{t_{i+1}} \cap \hat{\Omega}_{t_i}) &= H_{n, t_i}(\hat{\Omega}_{t_i}) - H_{n, t_i}(\hat{\Omega}_{t_i} \setminus \hat{\Omega}_{t_{i+1}}). \end{aligned}$$

It follows that

$$\begin{aligned} H_{n, t_{i+1}}(\hat{\Omega}_{t_{i+1}} \cup \hat{\Omega}_{t_i}) + H_{n, t_i}(\hat{\Omega}_{t_{i+1}} \cap \hat{\Omega}_{t_i}) \\ = H_{n, t_{i+1}}(\hat{\Omega}_{t_{i+1}}) + H_{n, t_i}(\hat{\Omega}_{t_i}) + H_{n, t_{i+1}}(\hat{\Omega}_{t_i} \setminus \hat{\Omega}_{t_{i+1}}) \\ - H_{n, t_i}(\hat{\Omega}_{t_i} \setminus \hat{\Omega}_{t_{i+1}}), \end{aligned}$$

with  $H_{n, t_{i+1}}(\hat{\Omega}_{t_i} \setminus \hat{\Omega}_{t_{i+1}}) - H_{n, t_i}(\hat{\Omega}_{t_i} \setminus \hat{\Omega}_{t_{i+1}}) \geq 0$  since  $H_{n, t}$  is decreasing in  $t$ . But on the other hand, by

definition of  $\hat{\Omega}_{t_{i+1}}$  and  $\hat{\Omega}_{t_i}$  we have:

$$\begin{aligned} H_{n,t_{i+1}}(\hat{\Omega}_{t_{i+1}} \cup \hat{\Omega}_{t_i}) &\leq H_{n,t_{i+1}}(\hat{\Omega}_{t_{i+1}}), \\ H_{n,t_i}(\hat{\Omega}_{t_{i+1}} \cap \hat{\Omega}_{t_i}) &\leq H_{n,t_i}(\hat{\Omega}_{t_i}). \end{aligned}$$

Finally we get:

$$\begin{aligned} H_{n,t_{i+1}}(\hat{\Omega}_{t_{i+1}} \cup \hat{\Omega}_{t_i}) &= H_{n,t_{i+1}}(\hat{\Omega}_{t_{i+1}}), \\ H_{n,t_i}(\hat{\Omega}_{t_{i+1}} \cap \hat{\Omega}_{t_i}) &= H_{n,t_i}(\hat{\Omega}_{t_i}). \end{aligned}$$

Proceeding by induction we have, for every  $m$  such that  $k+m \leq K$ :

$$\begin{aligned} H_{n,t_{i+m}}(\hat{\Omega}_{t_i} \cup \hat{\Omega}_{t_{i+1}} \cup \dots \cup \hat{\Omega}_{t_{i+m}}) &= H_{n,t_{i+m}}(\hat{\Omega}_{t_{i+m}}), \\ H_{n,t_i}(\hat{\Omega}_{t_i} \cap \hat{\Omega}_{t_{i+1}} \cap \dots \cap \hat{\Omega}_{t_{i+m}}) &= H_{n,t_i}(\hat{\Omega}_{t_i}). \end{aligned}$$

Taking (i=1, m=k-1) for the first equation and (i=k, m=K-k) for the second completes the proof.

### Proof of Theorem 1

We shall use the following lemma:

**Lemma 2.1.** *With probability at least  $1 - \delta$ , for  $k \in \{1, \dots, K\}$ ,  $0 \leq EM^*(t_k) - EM_{s_K}(t_k) \leq 2\Phi_n(\delta)$ .*

### Proof of Lemma 2.1:

Remember that by definition of  $\hat{\Omega}_{t_k}$ :  $H_{n,t_k}(\hat{\Omega}_{t_k}) = \max_{\Omega \in \mathcal{G}} H_{n,t_k}(\Omega)$  and note that:

$$EM^*(t_k) = \max_{\Omega \text{ meas.}} H_{t_k}(\Omega) = \max_{\Omega \in \mathcal{G}} H_{t_k}(\Omega) \geq H_{t_k}(\hat{\Omega}_{t_k}).$$

On the other hand, using (5), with probability at least  $1 - \delta$ , for every  $G \in \mathcal{G}$ ,  $|\mathbb{P}(G) - \mathbb{P}_n(G)| \leq \Phi_n(\delta)$ . Hence, with probability at least  $1 - \delta$ , for all  $\Omega \in \mathcal{G}$ :

$$H_{n,t_k}(\Omega) - \Phi_n(\delta) \leq H_{t_k}(\Omega) \leq H_{n,t_k}(\Omega) + \Phi_n(\delta)$$

so that, with probability at least  $(1 - \delta)$ , for  $k \in \{1, \dots, K\}$ ,

$$\begin{aligned} H_{n,t_k}(\hat{\Omega}_{t_k}) - \Phi_n(\delta) &\leq H_{t_k}(\hat{\Omega}_{t_k}) \\ &\leq EM^*(t_k) \\ &\leq H_{n,t_k}(\hat{\Omega}_{t_k}) + \Phi_n(\delta), \end{aligned}$$

whereby, with probability at least  $(1 - \delta)$ , for  $k \in \{1, \dots, K\}$ ,

$$0 \leq EM^*(t_k) - H_{t_k}(\hat{\Omega}_{t_k}) \leq 2\Phi_n(\delta).$$

The following Lemma is a consequence of the derivative property of  $EM^*$  (Proposition 1)

**Lemma 2.2.** *Let  $k$  in  $\{1, \dots, K-1\}$ . Then for every  $t$  in  $]t_{k+1}, t_k]$ ,  $0 \leq EM^*(t) - EM^*(t_k) \leq \lambda(t_{k+1})(t_k - t_{k+1})$ .*

Combined with Lemma 2.1 and the fact that  $EM_{s_K}$  is non-increasing, and writing  $EM^*(t) - EM_{s_K}(t) = (EM^*(t) - EM^*(t_k)) + (EM^*(t_k) - EM_{s_K}(t_k)) + (EM_{s_K}(t_k) - EM_{s_K}(t))$  this result leads to:

$$\begin{aligned} \forall k \in \{0, \dots, K-1\}, \forall t \in ]t_{k+1}, t_k], \\ 0 \leq EM^*(t) - EM_{s_K}(t) \leq 2\Phi_n(\delta) + \lambda(t_{k+1})(t_k - t_{k+1}) \end{aligned}$$

which gives Lemma 2 stated in section Technical Details. Notice that we have not yet used the fact that  $f$  has a compact support.

The compactness support assumption allows an extension of Lemma 2.2 to  $k = K$ , namely the inequality holds true for  $t$  in  $]t_{K+1}, t_K] = ]0, t_K]$  as soon as we let  $\lambda(t_{K+1}) := \text{Leb}(supp f)$ . Indeed the compactness of  $supp f$  implies that  $\lambda(t) \rightarrow \text{Leb}(supp f)$  as  $t \rightarrow 0$ . Observing that Lemma 2.1 already contains the case  $k = K$ , this leads to, for  $k$  in  $\{0, \dots, K\}$  and  $t \in ]t_{k+1}, t_k]$ ,  $|EM^*(t) - EM_{s_K}(t)| \leq 2\Phi_n(\delta) + \lambda(t_{k+1})(t_k - t_{k+1})$ . Therefore,  $\lambda$  being a decreasing function bounded by  $\lambda(\text{Leb}(supp f))$ , we obtain the following: with probability at least  $1 - \delta$ , we have for all  $t$  in  $]0, t_1]$ :

$$\begin{aligned} |EM^*(t) - EM_{s_K}(t)| \\ \leq \left( A + \sqrt{2 \log(1/\delta)} \right) \frac{1}{\sqrt{n}} \\ + \lambda(\text{Leb}(supp f)) \sup_{1 \leq k \leq K} (t_k - t_{k+1}). \end{aligned}$$

### Proof of Theorem 2

The first part of this theorem is a consequence of (10) combined with:

$$\begin{aligned} \sup_{t \in ]0, t_N]} |EM^*(t) - EM_{s_N}(t)| &\leq 1 - EM_{s_N}(t_N) \\ &\leq 1 - EM^*(t_N) + 2\Phi_n(\delta), \end{aligned}$$

where we use the fact that  $0 \leq EM^*(t_N) - EM_{s_N}(t_N) \leq 2\Phi_n(\delta)$  following from Lemma 2.1.

To see the convergence of  $s_N(x)$ , note that:

$$\begin{aligned} s_N(x) &= \frac{t_1}{\sqrt{n}} \sum_{k=1}^{\infty} \frac{1}{(1 + \frac{1}{\sqrt{n}})^k} \mathbb{1}_{x \in \hat{\Omega}_{t_k}} \mathbb{1}_{\{k \leq N\}} \\ &\leq \frac{t_1}{\sqrt{n}} \sum_{k=1}^{\infty} \frac{1}{(1 + \frac{1}{\sqrt{n}})^k} < \infty, \end{aligned}$$

and analogically to remark 1 observe that  $EM_{s_N} \leq EM_{s_\infty}$  so that  $\sup_{t \in ]0, t_1]} |EM^*(t) - EM_{s_\infty}(t)| \leq \sup_{t \in ]0, t_1]} |EM^*(t) - EM_{s_N}(t)|$  which proves the last part of the theorem.

**Proof of Lemma 3**

By definition, for every class of set  $\mathcal{H}$ ,  $EM_{\mathcal{H}}^*(t) = \max_{\Omega \in \mathcal{H}} H_t(\Omega)$ . The bias  $EM^*(t) - EM_{\mathcal{G}}^*(t)$  of the model  $\mathcal{G}$  is majored by  $EM^*(t) - EM_{\mathcal{F}}^*(t)$  since  $\mathcal{F} \subset \mathcal{G}$ . Remember that  $f_F(x) := \sum_{i \geq 1} \mathbb{1}_{x \in F_i} \frac{1}{|F_i|} \int_{F_i} f(y) dy$  and note that for all  $t > 0$ ,  $\{f_F > t\} \in \mathcal{F}$ . It follows that:

$$\begin{aligned}
 EM^*(t) - EM_{\mathcal{F}}^*(t) &= \int_{f>t} (f - t) - \sup_{C \in \mathcal{F}} \int_C (f - t) \\
 &\leq \int_{f>t} (f - t) - \int_{f_F>t} (f - t) \text{ since } \{f_F > t\} \in \mathcal{F} \\
 &= \int_{f>t} (f - t) - \int_{f_F>t} (f_F - t) \\
 &\qquad\qquad\qquad \text{since } \forall G \in \mathcal{F}, \int_G f = \int_G f_F \\
 &= \int_{f>t} (f - t) - \int_{f>t} (f_F - t) + \int_{f>t} (f_F - t) \\
 &\qquad\qquad\qquad - \int_{f_F>t} (f_F - t) \\
 &= \int_{f>t} (f - f_F) + \int_{\{f>t\} \setminus \{f_F>t\}} (f_F - t) \\
 &\qquad\qquad\qquad - \int_{\{f_F>t\} \setminus \{f>t\}} (f_F - t).
 \end{aligned}$$

Observe that the second and the third term in the bound are non-positive. Therefore:

$$EM^*(t) - EM_{\mathcal{F}}^*(t) \leq \int_{f>t} (f - f_F) \leq \int_{\mathbb{R}^d} |f - f_F|.$$

**References**

[1] H. Federer. *Geometric Measure Theory*. Springer, 1969.
